# Supplementary material
Source: PubMed Central journal article supplement (PMC3592933)
Supplement: 12_318_Gonzalez-Nunez.Suppl.pdf [file 12_318_Gonzalez-Nunez.Suppl.pdf]

## Supplemental Data

# In Vivo Regulation of the $\mu$ Opioid Receptor: Role of the Endogenous Opioid Agents

Veronica Gonzalez-Nunez,<sup>1,2</sup> Ada Jimenez González,<sup>1,2</sup> Katherine Barreto-Valer,<sup>1,2</sup> and Raquel E Rodríguez<sup>1,2</sup>

Online address: <http://www.molmed.org>

The Feinstein Institute  
for Medical Research 

**Supplementary Table S1.** Primers used for qPCR analysis. Summary of the primers that have been used in qPCR experiments, amplicon length and ENSEMBL Gene ID.

| Precursor       | ENSEMBL Gene ID    | qPCR Primer sequence                                          | Amplicon length |
|-----------------|--------------------|---------------------------------------------------------------|-----------------|
| <i>eef1a1l1</i> | ENSDARG00000020850 | 5' TCAAGAAGATCGGCTACAAC 3'<br>5' CCTGAACCCAGCCCATGT 3'        | 105 bp          |
| <i>penk a</i>   | ENSDARG00000004869 | 5' GACAGACAGACATCGACACACTG 3'<br>5' ATGGTTTGCACCTCTTCATCTT 3' | 149 bp          |
| <i>penk b</i>   | ENSDARG00000036045 | 5' GAGGACTGCGCGTACTGTCT 3'<br>5' GCTCCTCACACTCCAACACA 3'      | 85 bp           |
| <i>pomc a</i>   | ENSDARG00000043135 | 5' CCGCTGTGCGAGACCTCAG 3'<br>5' CTGTAAGTTCAGACCTGCATAATTG 3'  | 110 bp          |
| <i>pomc b</i>   | ENSDARG00000069307 | 5' TGTGTTTTCACAGCCACAT 3'<br>5' CGATCTGCACTTCTGAGACAC 3'      | 110 bp          |
| <i>mor</i>      | ENSDARG00000039434 | 5' ACGAGCTGTGCAAGATTGTG 3'<br>5' CCGATTGCAGATGAAAGGAT 3'      | 187 bp          |

**Supplementary Table S2.** Statistical analysis of the Ki-values obtained in the pharmacological experiments. This table summarizes the statistical significance for the Log (Ki-values, M) that have been assessed from the competition binding assays. Data were analyzed by one-way analysis of variance (ANOVA) followed by Tukey post-hoc test using GraphPad Prism software (San Diego, CA, USA). Legend: ME- Met-Enkephalin, LE - Leu-Enkephalin,  $\beta$ -END -  $\beta$ -endorphin, MEGY - Met-Enkephalin-Gly-Tyr. n.s. - not statistically significant; \* -  $p < 0.05$ ; \*\* -  $p < 0.01$ ; \*\*\* -  $p < 0.001$ .

|                                               | LE   | $\beta$ -END | MEGY | (D-Ala <sup>2</sup> )-MEGY | (D-Ala <sup>2</sup> , Val <sup>5</sup> )-MEGY | Morphine | Naloxone |
|-----------------------------------------------|------|--------------|------|----------------------------|-----------------------------------------------|----------|----------|
| ME                                            | n.s. | **           | **   | n.s.                       | ***                                           | **       | ***      |
| LE                                            |      | ***          | ***  | n.s.                       | *                                             | ***      | ***      |
| $\beta$ -END                                  |      |              | n.s. | **                         | ***                                           | n.s.     | ***      |
| MEGY                                          |      |              |      | **                         | ***                                           | n.s.     | ***      |
| (D-Ala <sup>2</sup> )-MEGY                    |      |              |      |                            | ***                                           | **       | ***      |
| (D-Ala <sup>2</sup> , Val <sup>5</sup> )-MEGY |      |              |      |                            |                                               | ***      | ***      |
| Morphine                                      |      |              |      |                            |                                               |          | ***      |
